1 **3D structure and *in situ* arrangements of CatSper channel in the sperm flagellum**

2

3 Yanhe Zhao<sup>1†</sup> Huafeng Wang<sup>2†</sup>, Caroline Wiesehofer<sup>3</sup>, Naman B. Shah<sup>4,5</sup>, Evan Reetz<sup>1</sup>, Jae  
4 Yeon Hwang<sup>2</sup>, Xiaofang Huang<sup>2</sup>, Polina V. Lishko<sup>4,6</sup>, Karen M. Davies<sup>4,5</sup>, Gunther Wennemuth<sup>3</sup>,  
5 Daniela Nicastro<sup>1\*</sup>, Jean-Ju Chung<sup>2,7\*</sup>

6

7 <sup>1</sup>Department of Cell Biology, University of Texas Southwestern Medical Center, Dallas, TX  
8 75390, USA

9 <sup>2</sup>Department of Cellular and Molecular Physiology, Yale School of Medicine, New Haven, CT  
10 06510, USA

11 <sup>3</sup>Department of Anatomy, University of Duisburg-Essen, Medical Faculty, 45147 Essen,  
12 Germany

13 <sup>4</sup>Department of Molecular and Cell Biology, University of California, Berkeley, CA 94720, USA

14 <sup>5</sup>Molecular Biophysics and Integrative Bioimaging division, Bioscience Area, Lawrence  
15 Berkeley National Laboratory, Berkeley, CA, 94720, USA

16 <sup>6</sup>The Center for Reproductive Longevity and Equality, Buck Institute for Research on Aging,  
17 Novato, CA 94945, USA

18 <sup>7</sup>Department of Obstetrics, Gynecology, and Reproductive Sciences, Yale School of Medicine,  
19 New Haven, CT 06510, USA

20

21 <sup>†</sup>Equal contribution

22 \*Correspondence: Daniela Nicastro ([Daniela.Nicastro@UTSouthwestern.edu](mailto:Daniela.Nicastro@UTSouthwestern.edu)); Jean-Ju Chung  
23 ([jean-ju.chung@yale.edu](mailto:jean-ju.chung@yale.edu))

24

25

26 Running title: 3D structure and *in situ* arrangements of mammalian CatSper channel

27

28

29

30

31

32 **Abstract**

33

34 The sperm calcium channel CatSper plays a central role in successful fertilization as a primary  
35  $\text{Ca}^{2+}$  gateway into the sperm flagellum. However, CatSper's complex subunit composition has  
36 impeded its reconstitution *in vitro* and structural elucidation. Here, we applied cryo-electron  
37 tomography to visualize the macromolecular organization of the native CatSper channel complex  
38 in intact mammalian sperm, as well as identified three additional CatSper-associated proteins.  
39 The repeating CatSper units form long zigzag-rows in four nanodomains along the flagella. In  
40 both mouse and human sperm, each CatSper repeat consists of a tetrameric pore complex.  
41 Murine CatSper contains an additional outwardly directed wing-structure connected to the  
42 tetrameric channel. The majority of the extracellular domains form a canopy above each pore-  
43 forming channel that interconnects to a zigzag-shaped roof. The intracellular domains link two  
44 neighboring channel complexes to a diagonal array. The loss of this intracellular link in *Efcab9<sup>-/-</sup>*  
45 sperm distorts the longitudinally aligned zigzag pattern and compromises flagellar movement.  
46 This work offers unique insights into the mechanisms underlying the assembly and transport of  
47 the CatSper complex to generate the nanodomains and provides a long-sought structural basis for  
48 understanding CatSper function in the regulation of sperm motility.

49

50

51 Freshly ejaculated mammalian sperm must undergo a physiological process called capacitation  
52 to be capable of fertilizing the egg<sup>1,2</sup>. The crucial change that occurs during capacitation  
53 represents a motility change, i.e. the sperm flagellum beats vigorously and asymmetrically,  
54 producing a whip-like motion. This motility pattern – known as hyperactivated motility – enables  
55 the sperm to reach the egg by overcoming the viscous microenvironment of the female  
56 reproductive tract. Additionally, hyperactivation allows sperm to push through a sticky egg coat,  
57 and eventually fertilize the egg<sup>3</sup>. Hyperactivation is triggered by the elevation of the  
58 intraflagellar calcium that requires the sperm-specific and Ca<sup>2+</sup>-selective CatSper channel<sup>4,5</sup>.  
59 CatSper loss-of-function abrogates hyperactivation of the sperm flagellum and renders males  
60 infertile in both mice and humans<sup>6</sup>.

61  
62 Previous studies have found that CatSper is the most complex ion channel known, with at least  
63 ten proteins: four subunits that form a heterotetrameric channel (CATSPER1-4)<sup>5,7</sup>, as well as six  
64 additional, non-pore forming subunits, including four transmembrane (TM) proteins with large  
65 extracellular domains (ECD) (CATSPER $\beta$ ,  $\gamma$ ,  $\delta$ , and  $\epsilon$ )<sup>8-11</sup> and two smaller cytoplasmic,  
66 calmodulin (CaM)-IQ domain proteins that form the EFCAB9-CATSPER $\zeta$  complex<sup>8,12,13</sup>  
67 (Extended data Table 1). Deletions or mutations of any of the pore-forming or other TM-subunits  
68 results in the loss of the entire CatSper channel complex<sup>6</sup>. Super resolution light microscopy  
69 showed that the CatSper channel complex is restricted to four linear compartments within the  
70 flagellar membrane<sup>14,15</sup>, generating a unique longitudinal signaling nanodomain in each flagellar  
71 quadrant. Genetic evidence suggested that this high-order arrangement is essential for Ca<sup>2+</sup>  
72 signaling and sperm hyperactivation, highlighting physiological relevance of the spatial  
73 organization. Disrupting the integrity of the linear nanodomains alters the flagellar waveform  
74 and prevents sperm from efficiently migrating *in vivo*<sup>8,14,16</sup>. Specifically, the absence of the  
75 cytoplasmic EFCAB9-CATSPER $\zeta$  complex in *Efcab9*<sup>-/-</sup> and/or *Catsperz*<sup>-/-</sup> mutant sperm alters  
76 the continuity of each CatSper nanodomain<sup>8,12</sup>, suggesting a regularly repeating, quaternary  
77 structure of the CatSper complex within the nanodomains.

78  
79 Despite many important discoveries mentioned above, the fundamental structure of the native  
80 channel complex and its molecular architectural arrangement were still not known. Here, we  
81 address these questions by visualizing in-cell organization and domain structures of the CatSper  
82 channel complex in intact mouse and human sperm flagella using cryo-electron tomography  
83 (cryo-ET).

84  
85 **Macromolecular composition of the CatSper complex.** Ten components have been validated  
86 to comprise the CatSper channel complex in the linear nanodomains<sup>6</sup>. However, we previously  
87 showed by comparative mass-spectrometry that in mouse *Catsper1*<sup>-/-</sup> sperm four additional  
88 proteins were reduced: C2CD6 (C2 Calcium-dependent Domain-containing protein 6, also  
89 known as ALS2CR11), E3 ubiquitin-protein ligase TRIM69, SLCO6C1 (solute carrier organic

90 anion transporter family, member 6c1), and the DNA-binding ATPase FANCM (Fanconi  
91 anemia, complementation group M)<sup>12</sup> (see also Extended Data Fig. 1a).

92

93 To test whether these four candidates are truly associated with the CatSper channel, we used  
94 western blot analyses of *Catsper1*<sup>-/-</sup> and *Catsperd*<sup>-/-</sup> sperm that lack the entire CatSper channel  
95 complex<sup>9,12,14</sup>, and found that the protein levels of C2CD6, TRIM69, and SLCO6C1, but not  
96 FANCM, were indeed reduced (Fig. 1a and Extended Data Fig. 1b, c). Moreover, using  
97 fluorescence and 3D structured illumination microscopy (3D SIM) we showed that the three  
98 CATSPER1/δ-dependent proteins, *i.e.* C2CD6, TRIM69, and SLCO6C1, localize in the principal  
99 piece - the longest part of the sperm flagellum harboring the CatSper channel - and display the  
100 same quadrilinear distribution with the nanodomains (Fig. 1b, c, and Extended Data Fig. 1c-f). In  
101 the absence of EFCAB9 and/or ζ, the continuous distribution is disrupted (Fig. 1c and Extended  
102 Data Fig. 1f, *lower*), resembling previously reported results for the known CatSper subunits<sup>8,12</sup>.  
103 This typical dependence of protein levels and localizations on other CatSper components suggest  
104 that they are likely three new *bona fide* CatSper-associated proteins of murine sperm. In  
105 particular, it is intriguing to find an organic anion transporter, SLCO6C1 that is highly expressed  
106 in rodent testis<sup>12,17,18</sup>, in complex with an ion channel, the murine CatSper. Whereas the loss-of-  
107 function effect of C2CD6 remains to be determined, *Trim69*<sup>19</sup> and *Slco6c1*<sup>20</sup> are not essential for  
108 fertility, indicating their function on the CatSper channel is likely to be modulatory and/or  
109 indirect.

110

111 **In-cell organization of CatSper complexes.** Based on the discovery of the additional CatSper  
112 components here, and the recently reported 1:1 stoichiometry of seven TM CatSper subunits in  
113 sea urchin sperm (*i.e.* CATSPER1-4, β, γ, and ε)<sup>21</sup>, we hypothesize that a single mouse or human  
114 CatSper complex might form a nearly half-megadalton extracellular domain (ECD) (Extended  
115 Data Table 1), a size that could be visualized by cellular cryo-ET. Therefore, we performed cryo-  
116 ET on intact murine and human sperm flagella to characterize the native CatSper complex *in*  
117 *situ*, which avoids potential purification artefacts. Viewing the 3D reconstructed sperm and  
118 flagellar membranes in cross-section, we observed protruding particles of ~25 nm in width  
119 positioned to either side of the longitudinal column of the fibrous sheath in the principal piece  
120 (Fig. 1d), consistent with the localization for CatSper nanodomains as seen by immuno-electron  
121 microscopy (EM)<sup>14</sup>. Out of the four quadrants, only up to two could be visualized in the cryo-  
122 tomograms due to the missing wedge effect that results from a limited tilt-angle range in single-  
123 axis ET. Longitudinal tomographic slices of the wild type sperm flagella revealed long  
124 continuous rows of densely packed particles with an apparent periodicity of 17.6 nm (Fig. 1e).  
125 The resolution of reconstructed whole murine flagella was limited due to the ~900 nm sample  
126 thickness of the proximal region of the principal piece. Therefore, we also used cryo-FIB milling  
127 to generate ~200 nm thick slices (called “lamella”) of murine sperm flagella (Extended Data Fig.  
128 2a-g) that resulted in higher-resolution tomographic reconstructions (Extended Data Fig. 2h, i;  
129 Extended Data Table 2).

130  
131 Due to all-or-none assembly of CatSper TM subunits in mouse sperm, knockout of any one of  
132 these TM subunits leads to mutant sperm that do not form the nanodomains as they lack the  
133 entire CatSper complex<sup>6</sup> (see also Extended Data Fig. 1a, b; *Catsper1*<sup>-/-</sup> and *Catsperd*<sup>-/-</sup>). By  
134 contrast, *Catsperz*<sup>-/-</sup> and/or *Efcab9*<sup>-/-</sup> sperm assemble the CatSper complex missing only the two  
135 interdependent non-TM EFCAB9 and CATSPERζ subunits<sup>12</sup> (see also Fig. 1a and Extended  
136 Data Fig. 1b). Because previous observations by super resolution light microscopy and scanning  
137 EM suggested the linearity of the nanodomains is discontinuous in a fragmented pattern in  
138 *Catsperz*<sup>-/-</sup> and *Efcab9*<sup>-/-</sup> sperm<sup>8,12</sup>, we next looked at *Efcab9*<sup>-/-</sup> sperm for CatSper particles.  
139 Indeed, we observed that the particles positioned to the corresponding locations in the flagellar  
140 membrane of *Efcab9*<sup>-/-</sup> sperm formed discontinuous rows, short clusters or individual repeat units  
141 (Fig. 1f, g). Together with the position of these particles along flagella, this genetic evidence, *i.e.*  
142 disruption of the particle-rows in *Efcab9*<sup>-/-</sup> sperm, strongly supports that these particles are  
143 macromolecular CatSper channel complexes that form the quadrilinear nanodomains.

144  
145 **Zigzag arrangement of CatSper complexes.** Slicing the rows of CatSper channel complexes in  
146 longitudinal orientation parallel to the flagellar membrane (top-down view) revealed continuous  
147 rows with repeating units in a zigzag arrangement of ~25 nm in width (Fig. 2a-h), demonstrating  
148 the CatSper complexes are repeated within the rows. We found that the number of zigzag rows  
149 per nanodomain varies from a single row (Fig. 2a, b), two rows that can be up to 100 nm apart  
150 (Fig. 2c, d and Extended Data Video 1) or merge into one row (Fig. 2e, f), or up to as many as  
151 five parallel rows (Fig. 2g, h). In tomograms of *Efcab9*<sup>-/-</sup> sperm flagella, we observed mostly  
152 short clusters containing only 1-7 units (Fig. 2k-n) and very few continuous rows with a  
153 maximum of ~70 repeats (Fig. 2i, j and Extended Data Fig. 3a, b). Interestingly, the short mutant  
154 clusters are no longer well-aligned with the flagellar axis and adopt various angles - up to almost  
155 perpendicular - relative to the longitudinal axis of the flagellum (Fig. 2l, n). In *Efcab9*<sup>-/-</sup> sperm,  
156 C2CD6, TRIM69, and SLCO6C1 proteins were reduced but detectable (Fig. 1a, b and Extended  
157 Data Fig. 1b) as seen for all the previously known 8 TM subunits<sup>12</sup>. These results suggest that the  
158 absence of the EFCAB9-CATSPERζ complex from the intracellular side of the channel disrupts  
159 the high-order arrangement of the CatSper channel complex and the linear alignment in the  
160 nanodomains. Cryo-tomograms of human sperm flagella revealed similar linear rows that are  
161 ~24 nm wide and consist of repeating units that are also arranged in a zigzag pattern (Fig. 2o-r).

162  
163 **Extracellular structures of CatSper form canopy tents that connect pore-forming channels**  
164 **as beads on a zigzag string.** After determining the periodicity of the CatSper complexes within  
165 the zigzag rows, we performed subtomogram averaging of the repeating units to increase the  
166 signal-to-noise ratio and thus the resolution. We averaged ~2500 CatSper complex repeat units  
167 (which includes the application of two-fold symmetry) from continuous rows from 11 acquired  
168 cryo-electron tomograms of both whole cells and cryo-FIB milled mouse wild type flagella  
169 (Extended Data Table 2). The averages depict unprecedented details of CatSper complexes *in*

170 *situ* (Fig.3a-h) with up to 22 Å resolution (0.5 FSC criterion; Extended Data Fig.3h, Extended  
171 Data Table 2).

172

173 As shown in Figure 3 and Extended Data Video 2, the averaged 3D structure of the zigzag row  
174 reveals that the CatSper complexes are evenly spaced in two anti-parallel lines, *i.e.* the  
175 complexes are 180° rotated between the two lines. The appearance of an ~25-nm-wide zigzag-  
176 pattern results from the staggering of the rows of channels and the ECDs connecting across the  
177 lines (Fig. 3c, d, g). Several structural features of the whole channel unit are visualized from  
178 extra- to intracellular domains across the inner and outer leaflet of the membrane bilayer (Fig.  
179 3a-h). In the side view (Fig. 3a), the most prominent structural feature of each CatSper complex  
180 is the uniquely shaped ECDs that form a 11.2 nm high canopy tent in which the majority of the  
181 ECD mass forms the canopy roof (Fig. 3a, f, g). The roof is connected between neighboring  
182 complexes to a continuous zigzag ribbon around 6.6 nm away from the flagellar membrane (Fig.  
183 3c, g).

184

185 Tangential slices (*i.e.*, top views) through this extracellular part, show closest to the membrane  
186 clearly the asymmetric unit: the tetrameric arrangement of the CATSPER1-4 subunits with an  
187 additional density that we named “wing” at the outside corners (Fig. 3d, white arrowheads). The  
188 position of the wing clearly reveals the 180° rotation between connected neighboring CatSper  
189 complexes. At an inside corner of the tetramer – opposite to the wing-connected subunit – at  
190 least one of the pore-forming channel subunits forms a fine but clearly visible connection to the  
191 identical subunit of the “forward slash”-neighboring, 180° rotated CatSper channel (Fig. 3d, blue  
192 arrowheads). The diameter of the tetrameric channel is 10.6 nm, which is in a similar range with  
193 the size observed for other tetrameric channels such as 10 nm wide Cav1.1<sup>22</sup>. The center-to-  
194 center spacing between channels along the zigzag string is 15 nm.

195

196 The ECD canopy roof is positioned right above the tetrameric channel (*i.e.*, the four tent poles)  
197 (Fig. 3a-d). Interestingly, the roof ridge (Fig. 3b; Fig. 3f-g, dark blue) is off-center and tilted in  
198 the same “forward slash” direction as the two connected inner pore-forming subunits (Fig. 3b, d).  
199 Based on the subtomogram average, the mass estimation of the ECDs of one CatSper channel  
200 complex is ~430 kDa, close to the sum of the ECDs predicted for the eight known TM subunits  
201 (CATSPER1-4, β, γ, δ, and ε) with 1:1 stoichiometry (Extended Data Table 1). We speculate that  
202 each TM auxiliary subunit specifically pairs with a particular pore-forming subunit.

203

204 **Intracellular structures of CatSper connect two channel units as diagonal arrays.** Markedly,  
205 the intracellular domains observed underneath the channel form a continuous diagonal array  
206 between two staggered channel complexes of the zigzag string (Fig. 3e, h). The diagonal stripes  
207 are spaced by 17.6 nm and are oriented in the same forward slash direction as the two connected  
208 inner pore-forming subunits (Fig. 3d). The side view of the complex shows that the intracellular



209 protrusion of an individual channel is not coaxial with the center of the tetrameric channel (Fig.  
210 3a).

211  
212 The mass estimation of the intracellular domains corresponding to one wild type CatSper  
213 channel complex is ~200 kDa (Fig. 3e, h), which is ~40 kDa smaller than the combined  
214 molecular weights of the cytoplasmic domains from the 10 reported CatSper subunits (Extended  
215 Data Table 1). As all the eight known TM subunits are required to make one channel unit<sup>6,21</sup>,  
216 these results suggest that two forward slash neighboring channels may form an intercomplex of  
217 2:1 stoichiometry such that an EFCAB9-CATSPER $\zeta$  pair links two channel units like an  
218 intracellular bridge, using two channels as a building block of the zigzag assembly. At this point,  
219 it remains unclear whether C2CD6 and TRIM69 would stabilize the CatSper complex or interact  
220 rather transiently. Their stoichiometry to other subunits also needs to be determined.

221  
222 **EFCAB9-CATSPER $\zeta$  complex has profound impact on the long- and short-range**  
223 **architecture of CatSper channels.** Interestingly, we observed that not only the length and  
224 alignment of the nanodomain rows was changed in *Efcab9*<sup>-/-</sup> sperm as compared to wild type  
225 sperm (Fig. 2), but also the arrangement between neighboring CatSper complexes were different  
226 (Fig. 3i-l and Extended Data Fig. 3c-g). The mutant averages showed that complexes are still  
227 arranged in two staggered and anti-parallel lines, as is evident from the preserved location of the  
228 wing density (Fig. 3k). However, in the mutant the usual zigzag pattern is disrupted, and instead  
229 neighboring complexes forms arrays of diagonal stripes that are oriented either in a backslash  
230 (Fig. 3i-k) or a forward slash direction (Extended Data Fig. 3d-f).

231  
232 In *Efcab9*<sup>-/-</sup> sperm, the intracellular domain of the CatSper complex is visible but appears  
233 reduced (Fig. 3l; Extended Data Fig. 3c, g) and is possibly mis-oriented in the predominant  
234 backslash arrangement (Fig. 3l). In the mutant with backslash phenotype, at the roof level the  
235 usual forward slash connection is greatly reduced (Fig. 2j, l, 3j) and a different subunit of the  
236 tetrameric channel forms the inner connection between neighboring complexes (Fig. 3k). The  
237 forward slash arrangement resembles the wild type organization at the tetrameric channel level,  
238 but at the roof level the usual backslash connection is missing (Fig. 2n; Extended Data Fig. 3b,  
239 e). Despite this re-arrangement, in both configurations, the rows or clusters have a width and  
240 ECD mass that is comparable with the wild type zigzag ribbon.

241  
242 **Similarities and differences between mouse and human sperm CatSper structures.** Cryo-  
243 tomograms and subtomogram average of human sperm flagella also revealed a ~24 nm wide  
244 zigzag string of staggered and anti-parallel arranged complexes on the extracellular side of the  
245 flagellar membrane (Fig. 3m-o). Although the resolution of the subtomogram average of human  
246 sperm flagella was limited by a low number of averaged repeats (Extended Data Fig. 3j and  
247 Extended Data Table 2), a 11.3 nm wide tetrameric channel with forward slash connection (Fig.  
248 3o), a center-to-center spacing between channels along the zigzag string of 15.2 nm, and the

249 canopy roofs in a zigzag-pattern were clearly visible (Fig. 3n), suggesting that these unique rows  
250 (Fig. 2o-r) are likely arrays of human CatSper complexes. We observed only two differences  
251 between the mouse and human sperm CatSper complex arrays: first, the human roof ridges were  
252 oriented opposite to that of the mouse CatSper, *i.e.* in the backslash direction (Fig. 3m), possibly  
253 reflecting an  $\sim 45^\circ$  counterclockwise rotation of each channel unit within the zigzag row; second,  
254 human CatSper appears to be missing the wing structure observed for the mouse CatSper  
255 tetrameric channel (compare Fig. 3o vs. 3d, Extended Data Fig. 5a). The molecular identity of  
256 the wing structure remains unclear. However, we propose that this wing consists of SLCO6C1 as  
257 it is a rodent-specific, multi-pass TM protein with small ECD, and its quadrilinear localization to  
258 the flagellar membrane is dependent on other TM CatSper subunits in mouse sperm (Fig. 1c and  
259 Extended Data Fig. 1c).

260

261 Physiological substrates are not yet identified for SLCO6C1<sup>17</sup>. However, the International Mouse  
262 Phenotyping Consortium reports that *Slco6c1*<sup>-/-</sup> mice show decreased circulating phosphorus  
263 level<sup>20</sup>, suggesting SLCO6C1 could be a potential phosphate transporter. As CatSper is required  
264 to sustain motility for extended period of time<sup>7,12</sup> which in turns is dependent on flagellar energy  
265 metabolism<sup>23,24</sup>, the association of SLCO6C1 with murine CatSper channel complex might be a  
266 species-specific molecular mechanism linking Ca<sup>2+</sup> homeostasis to ATP production via  
267 glycolysis. Compared with mouse sperm, which use glycolysis as a dominant source of ATP  
268 production<sup>25</sup>, human sperm might split ATP production differently between oxidative  
269 phosphorylation and glycolysis.

270

271 **Structural defects of mutant CatSper correlates with proximally stiff flagellum and**  
272 **compromised motility.** The CatSper-mediated increase in intracellular Ca<sup>2+</sup> initiates in the  
273 principal region of the tail and propagates towards the sperm head<sup>26</sup>. Our previous flagellar  
274 waveform analyses of head-tethered sperm showed that *Efcab9*<sup>-/-</sup> sperm display stiff flagella in  
275 the proximal region<sup>12</sup>. To better understand how the structural alterations of the mutant CatSper  
276 channel complexes are translated into altered flagellar curvature and motility in *Efcab9*<sup>-/-</sup> sperm,  
277 we characterized the flagellar waveform and swim paths of free-swimming sperm in detail over  
278 time using 3D high-speed Digital Holographic Microscopy<sup>27</sup> (Fig. 4, Extended Data Fig. 4).  
279 Capacitation dramatically increased *xy*-excursion with respect to the laboratory-fixed frame of  
280 reference, *i.e.* the out-of-plane beating of wild type sperm, which is abolished in *Efcab9*<sup>-/-</sup> sperm  
281 (Fig. 4a, c, d and Extended Data Fig. 4a). By contrast, capacitation did not significantly affect the  
282 flagellar *z*-excursion, *i.e.* the waveform amplitude (Fig. 4a, e), suggesting that Ca<sup>2+</sup> influx by  
283 CatSper activation mainly regulates asymmetric out-of-plane beating in the *xy*-direction, but not  
284 flagellar movement in the *z*-direction. Interestingly, the *z*-amplitude of non-capacitated *Efcab9*<sup>-/-</sup>  
285 sperm is smaller than that of wild type sperm (Fig. 4a, e), likely due to the proximally stiff  
286 flagellum of *Efcab9*<sup>-/-</sup> sperm. The proximally stiff mutant flagella might result from a lower basal  
287 level of intracellular calcium, balanced by basal CatSper activity and Ca<sup>2+</sup> extrusion pump<sup>12</sup>.

288



289 To further unravel the effect of the altered beat patterns on sperm swim paths, we determined the  
290 3D trajectories of free-swimming sperm by tracing the head positions using 3D high-speed  
291 Digital Holographic Microscopy. Consistent with the increase of curvilinear velocity (Extended  
292 Data Fig. 4b), the swimming trajectory of capacitated wild type sperm increase the range of  
293 excursion in all dimensions (Fig. 4b, left; compare Extended Data Video. 3 vs 4). In contrast,  
294 *Efcab9*<sup>-/-</sup> sperm fail to expand the excursion range during capacitation (Fig. 4b, right), suggesting  
295 the importance of CatSper channel and higher-order integrity on the effective sperm navigation  
296 during capacitation. Capacitation likely requires Ca<sup>2+</sup> signaling through the coordinate activity of  
297 many CatSper channels. Based on our structural findings and the motility defects in *Efcab9*<sup>-/-</sup>  
298 sperm, we propose that in wild type sperm the extracellular connected zigzag arrangement within  
299 a longitudinal nanodomain could coordinate the opening of the entire array of CatSper channels  
300 along the flagellar axis, ensuring a large and synchronous Ca<sup>2+</sup> influx to generate strong bending  
301 force (Extended Data Fig. 5b). In contrast, disruption of the CatSper zigzag-rows and  
302 misalignment from the longitudinal axis would dysregulate this domino-effect, thus preventing  
303 efficient intracellular Ca<sup>2+</sup> propagation towards the sperm head and resulting in a proximally stiff  
304 flagellum and altered sperm motility (Extended Data Fig. 5b). Taken together, this work provides  
305 an unprecedented structural basis for understanding the CatSper channel function in motility  
306 regulation of mammalian sperm.

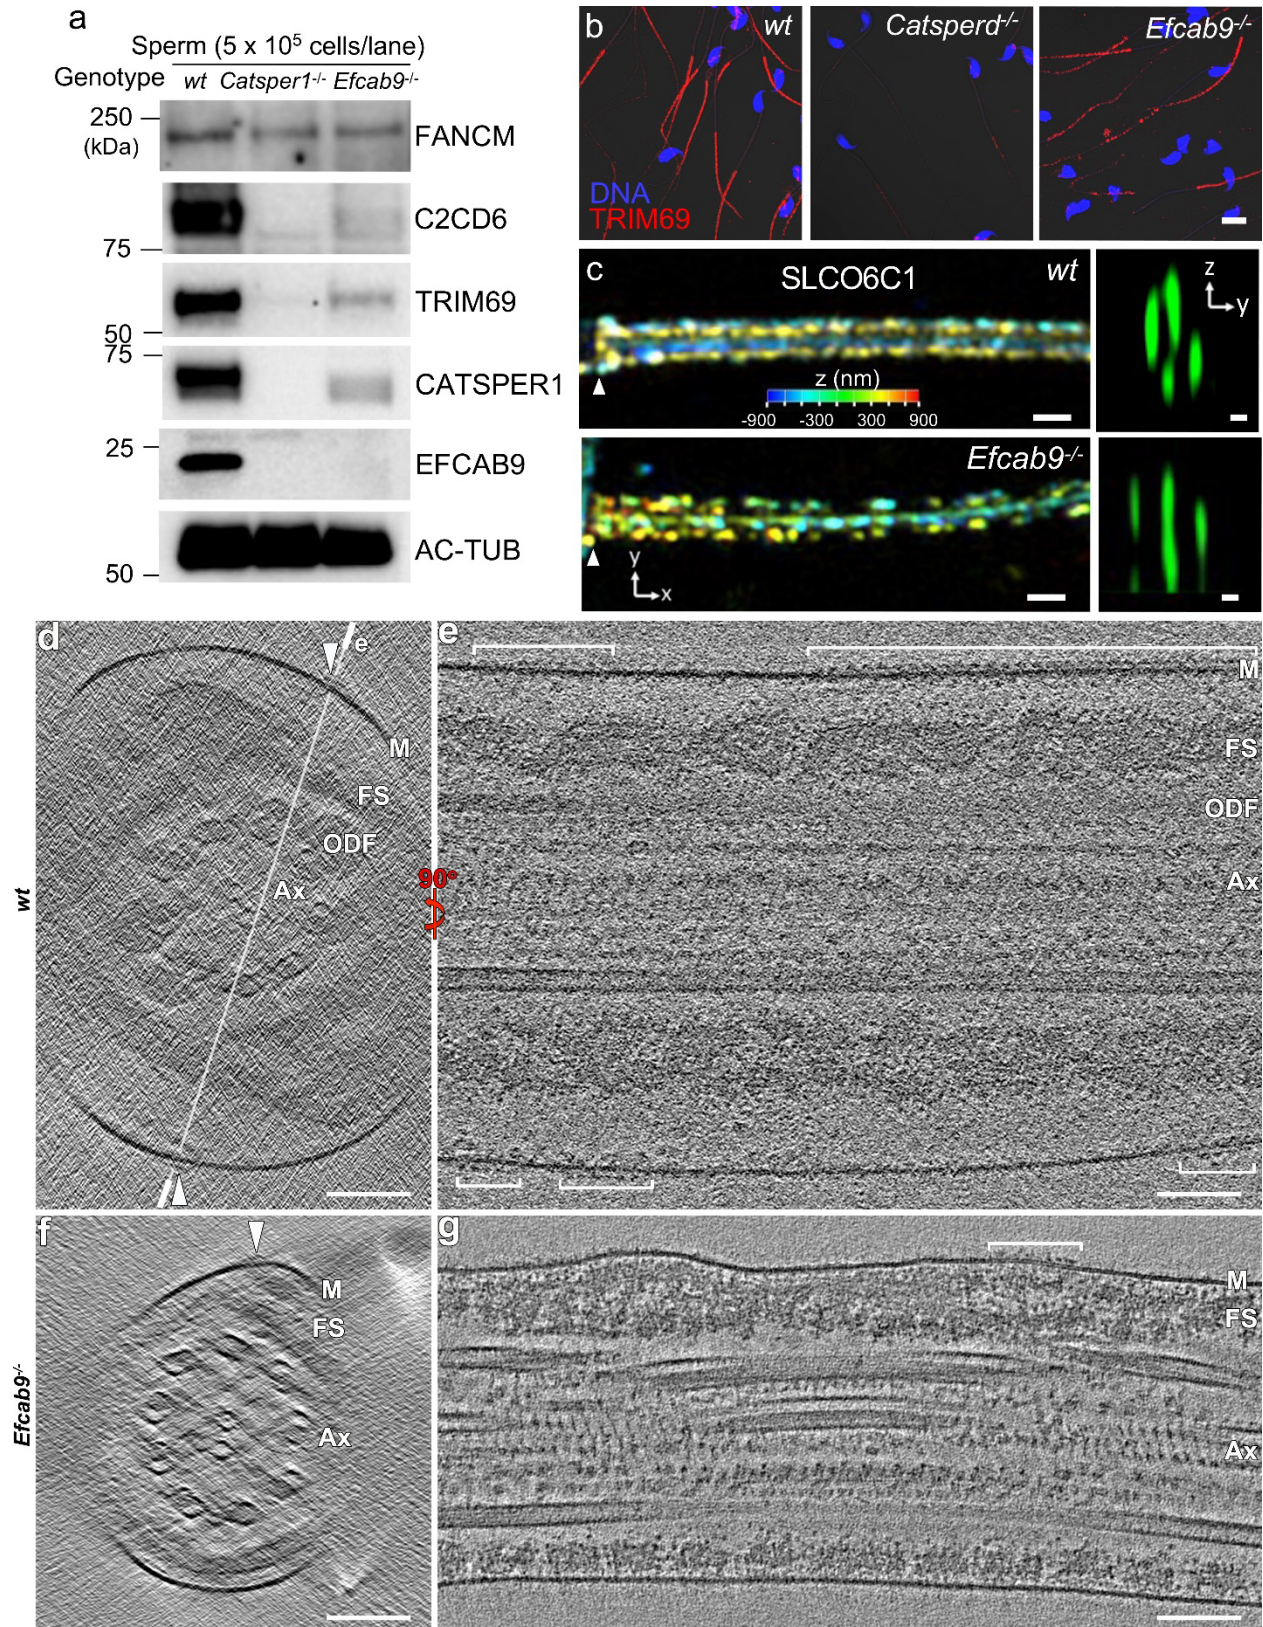

307

308 **Fig. 1 New CatSper components and cryo-ET of mouse sperm flagella visualizing particles**  
309 **of CatSper complexes. a.** Western blot analyses of four candidate CatSper-associated proteins  
310 in the whole cell proteome of mouse wild type, *Catsper1*<sup>-/-</sup> and *Efcab9*<sup>-/-</sup> sperm. **b-c.**  
311 Immunolocalization of TRIM69 (**b**, confocal light microscopy; sperm head stained blue using  
312 Hoechst) and SLCO6C1 (**c**, 3D SIM) in sperm from wild type, *Catsper1*<sup>-/-</sup>, and/or *Efcab9*<sup>-/-</sup> mice.  
313 In (**c**) colors in *xy* projection encode the relative distance from the focal plane along the *z* axis.  
314 Arrowheads in each panel indicate the annulus, the junction between the midpiece and principal  
315 piece of the sperm tail. *y-z* cross sections are shown on the right. Scale bar, 10 μm in **b**; 500 nm  
316 in **c** (left); 200 nm in **c** (right). **d-g.** Tomographic slices of representative principal piece regions  
317 of mouse sperm flagella show CatSper complexes (arrowheads) viewed in cross section (left)  
318 and longitudinal section (right): intact wild type (**d, e**) and *Efcab9*<sup>-/-</sup> (**f, g**) sperm in non-  
319 capacitated state. Other labels: M, membrane; ODF, outer dense fiber; FS, fibrous sheath; Ax,  
320 axoneme; CP, central pair. Scale bar, 100 nm in **d-g**.



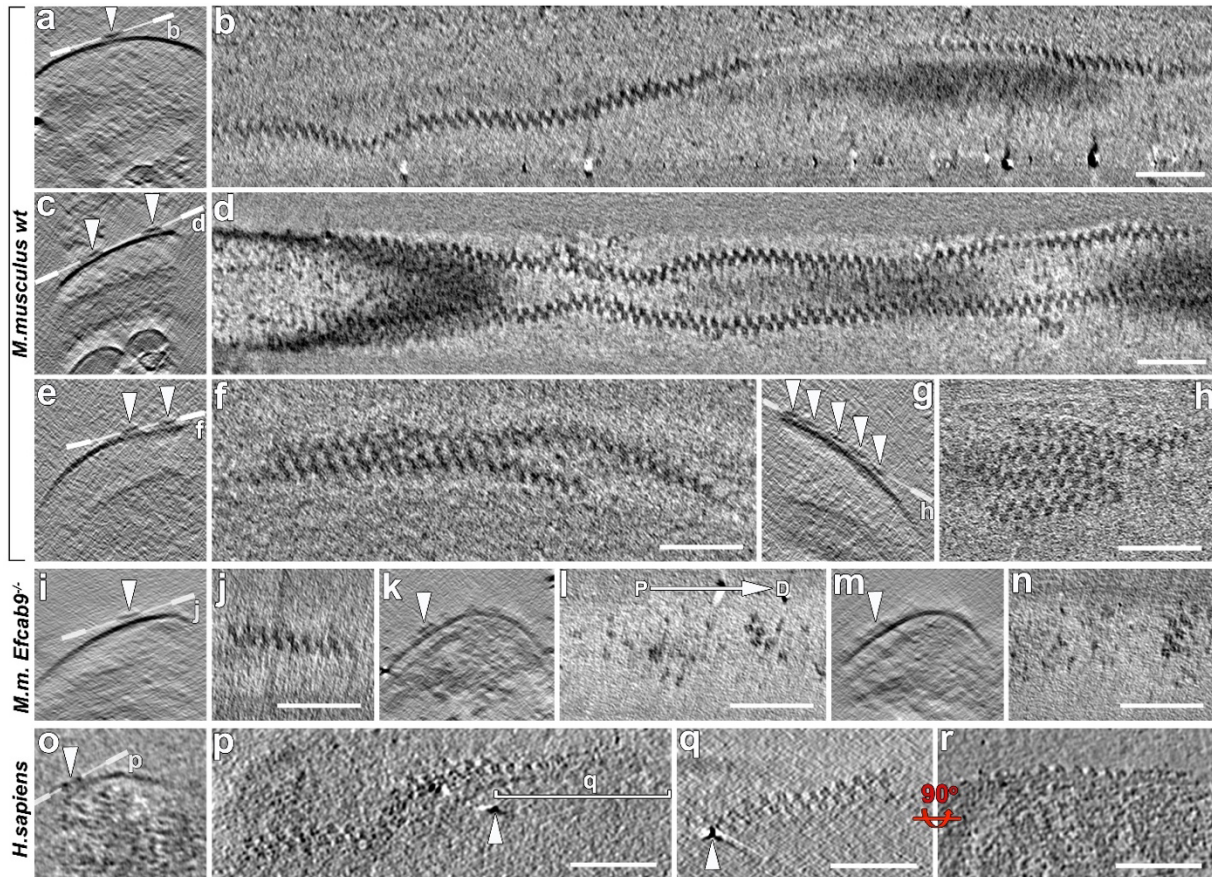

321

322 **Fig. 2 In-cell structure of the native CatSper complexes in intact sperm flagella. a-h.**

323 Representative tomographic slices of the repeating CatSper channel complexes arranged as  
324 zigzag-rows along the longitudinal axis of wild type flagella (cross view from proximal to distal:  
325 **a, c, e, g**; top-down view with proximal side of the flagellum on the left: **b, d, f, h**). The number  
326 of zigzag-rows (arrowheads) varied from a single row (**a, b**), two rows (**c, d**), merging rows (**e,**  
327 **f**), to up to five rows (**g, h**). **i-n**. Representative tomographic slices of *Efcab9*<sup>-/-</sup> sperm show  
328 fragmented, short CatSper complex clusters with altered orientation relative to the flagellar axis  
329 (cross section view: **i, k, m**; top-down view: **j, l, n**, the direction from proximal (P) to distal (D)  
330 as indicated). **o-r**. Zigzag-arrangement of CatSper in human sperm flagellum (cross section view:  
331 **o**; top-down view: **p, q**; side view, **r**). Scale bar, 100 nm.

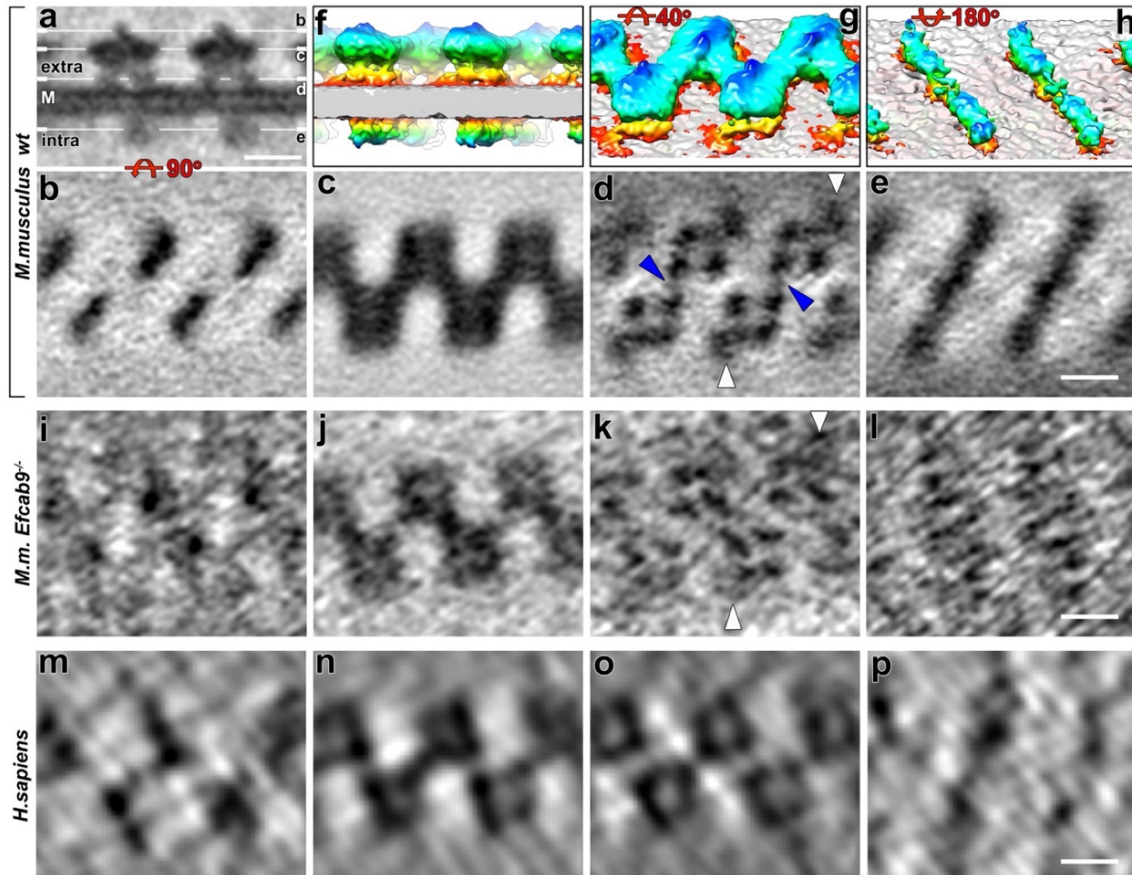

332

333 **Fig. 3 Structural features of CatSper complex in three dimensions.** a-e. Tomographic slices  
334 show the averaged CatSper complex structure from wild type mouse sperm in side (a) and top  
335 views (b-e). f-h. 3D isosurface renderings of the averaged CatSper complexes in wild type  
336 mouse sperm: f, side view; g, extracellular domain; h, intracellular domain. i-l. Tomographic  
337 slices show the averaged CatSper complex structure in *Efcab9*<sup>-/-</sup> sperm in a backslash direction.  
338 m-p. Tomographic slices show the averaged CatSper complex structure in human sperm  
339 flagellum. Lines in (a) indicate the slice positions showing the following structural features: b, i,  
340 m, roof ridge; c, j, n, canopy roof; d, k, o, tetrameric channel; e, l, p, channel intracellular  
341 domain. Other labels: white arrowheads, wing structure; blue arrowheads, inner connection  
342 between channel subunits, M, membrane. Scale bar, 10 nm.

343

344

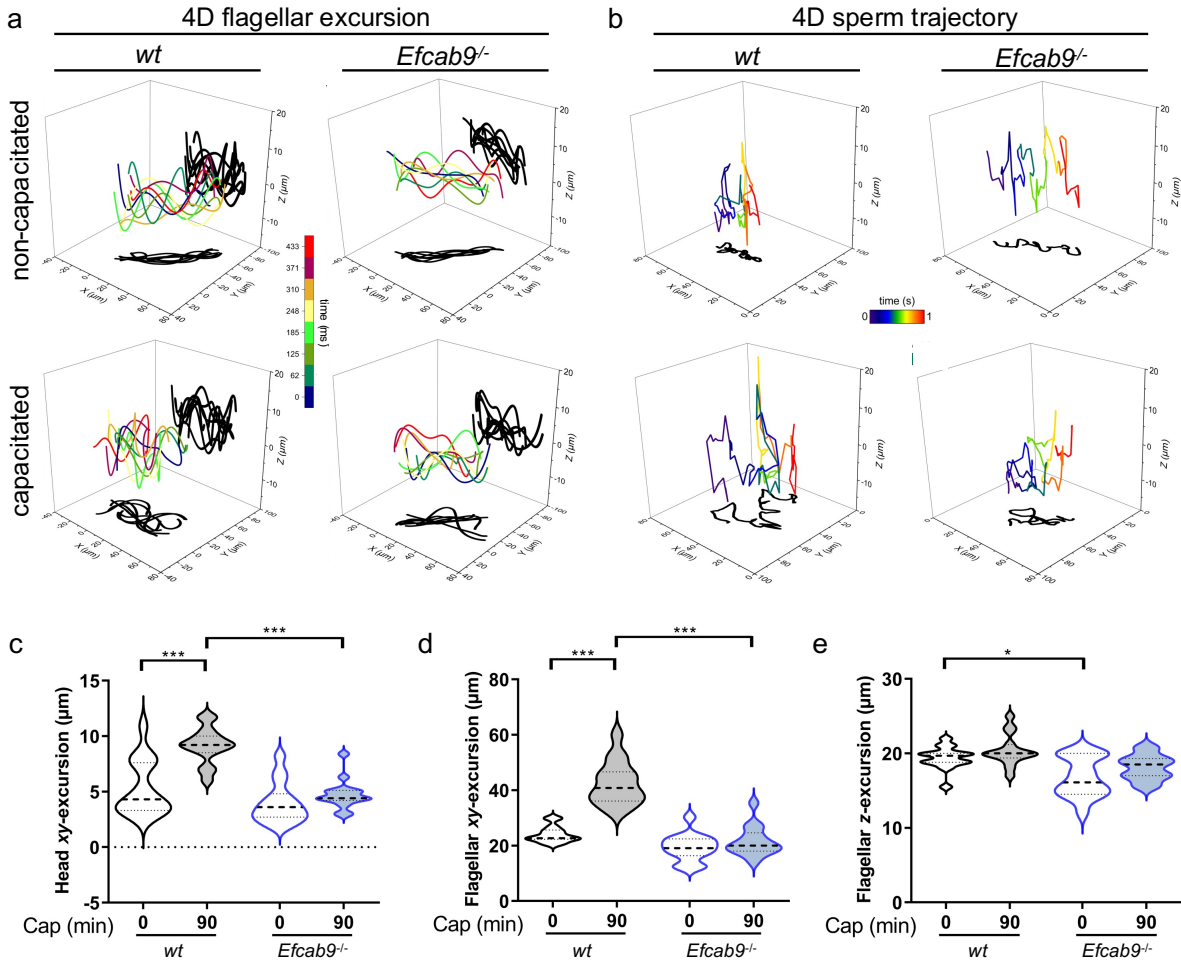

346 **Fig. 4 Flagellar beating waveform of free-swimming sperm in four dimensions.** **a.** 4D  
 347 flagellar beating waveform analyses of *wt* and *Efcab9*<sup>-/-</sup> sperm by high-speed digital holographic  
 348 microscopy (DHM). The time-lapse trace of a flagellum at 3D position (laboratory-fixed frame  
 349 of reference *xyz*) is visualized in color and its projections onto *xy*- and *xz*- planes are shadowed in  
 350 black. **b.** 4D sperm trajectory analyses of *wt* and *Efcab9*<sup>-/-</sup> sperm by DHM. The swimming  
 351 trajectory of sperm is visualized by tracing the head position. **c-e.** Statistical analyses of head (**c**)  
 352 and flagellar (**d**) *xy*-excursion, and flagellar *z*-excursion (**e**) from (**a**).  $n=15$  each group,  $*p <$   
 353  $0.05$ ,  $***p < 0.001$ ; the medians (thick dash lines) and interquartile ranges (thin dash lines).

354



## 355 **Materials and Methods**

356

### 357 **Human subjects**

358 A total of 3 healthy volunteers aged 25-39 were recruited for this study. Freshly ejaculated  
359 semen samples were obtained by masturbation and spermatozoa purified by the swim-up  
360 technique at 37°C as described in detail in<sup>28</sup>. All processed samples were normozoospermic with  
361 a cell count of at least  $30 \times 10^6$  sperm cells per mL. The experimental procedures utilizing  
362 human-derived samples were approved by the Committee on Human Research at the University  
363 of California, Berkeley, IRB protocol number 2013-06-5395.

364

### 365 **Animals**

366 *Catsper1*<sup>-/-</sup>, *Catsperd*<sup>-/-</sup>, *Catsperz*<sup>-/-</sup> and *Efcab9*<sup>-/-</sup> mice generated in the previous studies<sup>5,8,9,12</sup> are  
367 maintained on a C57/BL6 background. Mice were treated in accordance with guidelines  
368 approved by the Yale Animal Care and Use Committees (IACUC).

369

### 370 **Antibodies**

371 Rabbit polyclonal antibodies specific to mouse CATSPER1<sup>5</sup>,  $\delta$ <sup>9</sup>, and EFCAB9<sup>12</sup> were described  
372 previously. Briefly, to produce antibodies, peptides corresponding to mouse C2CD6  
373 (ALS2CR11) (359-377, EKLREKPRERLERMKEEYK) (Open Biosystems) and SLCO6C1 (1-  
374 14, MAHVRNKKSDDKKA) (GenScript) were synthesized and conjugated to KLH carrier  
375 protein. Antisera from the immunized rabbits were affinity-purified using the peptide  
376 immobilized on Amino Link Plus resin (Pierce). Other antibodies used in this study are  
377 commercially available as follows (TRIM69, Origene; Fancm, Affinity Biosciences; acetylated  
378 tubulin, Sigma). All the chemicals were from Sigma Aldrich unless otherwise indicated.

379

### 380 **Western blot analysis**

381 Whole mouse sperm protein content was extracted as previously described<sup>8,9,14</sup>. In short, mouse  
382 epididymal spermatozoa washed in PBS were directly lysed in a 2×SDS sample buffer. The  
383 whole sperm lysate was centrifuged at 15,000 g, 4°C for 10 min. After adjusting DTT to 50 mM,  
384 the supernatant was denatured at 95°C for 10 min before loading to gel. Antibodies used for  
385 Western blotting were antibodies against CATSPER1 (1 µg/mL),  $\delta$  (1 µg/mL), EFCAB9 (1  
386 µg/mL) and C2CD6 (1 µg/mL), TRIM69 (0.5 µg/mL), SLCO6C1 (2 µg/mL), FANCM (1  
387 µg/mL) and acetylated tubulin (1:10000 µg/mL). Secondary antibodies were anti-rabbit IgG-  
388 HRP (1:10,000), anti-goat IgG-HRP (1:10,000) and anti-mouse IgG-HRP (1:10,000) from  
389 Jackson ImmunoResearch (West Grove).

390

### 391 **Sperm immunocytochemistry**

392 Sperm were washed in PBS twice, attached on glass coverslips, and fixed with 4%  
393 paraformaldehyde (PFA) in PBS at room temperature (RT) for 10 minutes (mouse) or at 4°C for  
394 1 hr (human). Fixed samples were permeabilized using 0.1% Triton X-100 in PBS at RT for 10

395 minutes, washed in PBS, and blocked with 10% goat serum in PBS at RT for 1 hr. Cells were  
396 stained with anti-C2CD6 (10  $\mu\text{g}/\text{mL}$ ), TRIM69 (5  $\mu\text{g}/\text{mL}$ ), SLCO6C1 (10  $\mu\text{g}/\text{mL}$ ), FANCM (10  
397  $\mu\text{g}/\text{mL}$ ) in PBS supplemented with 10% donkey serum at 4°C overnight. After washing in PBS,  
398 the samples were incubated with donkey anti-goat Alexa 568 (Invitrogen, 1:1,000) in 10%  
399 donkey serum in PBS at RT for 1 hr. Hoechst was used to counterstain nuclei for sperm head  
400 visualization. Immunostained samples were mounted with Prolong gold (Invitrogen) and cured  
401 for 24 hr.

402

### 403 **Confocal and 3D structured illumination microscopy (SIM) imaging**

404 Confocal imaging was performed on the Cured samples by a Zeiss LSM710 using a Plan-  
405 Apochromat 63X/1.40 and an alpha Plan-APO 100X/1.46 oil objective lens (Carl Zeiss). 3D  
406 SIM imaging was performed with a Zeiss LSM710 Elyra P1 using an alpha Plan-APO  
407 100X/1.46 oil objective lens. A laser at 561 nm (200 mW) was used for Alexa 568 (Invitrogen).  
408 A z-stack was acquired from 42 optical sections with a 200 nm interval. Each section was  
409 imaged using 5 rotations with a 51 nm grating period. 3D SIM Images were rendered using Zen  
410 2012 SP2 software.

411

### 412 **Sperm sample preparation for cryo-electron microscopy**

413 Epididymal spermatozoa from adult male mice (wild type and *Efcab9*<sup>-/-</sup> in the C57BL/6  
414 background) were collected by swim-out from caudal epididymis as described<sup>29</sup>. Briefly, male  
415 mice were euthanized, and the cauda isolated from the mouse carcass and placed into a 1.5 mL  
416 tube with standard HEPES saline HS medium (in mM: 135 NaCl, 5 KCl, 1 MgSO<sub>4</sub>, 2 CaCl<sub>2</sub>, 20  
417 HEPES, 5 D-glucose, 10 Lactic acid, 1 Na pyruvate, pH 7.4 adjusted with NaOH, osmolarity 320  
418 mOsm/L) at room temperature. To retrieve the mature spermatozoa, the caudal epididymis was  
419 cut into several pieces with a scalpel and placed into a 37°C incubator for 10-30 min to let the  
420 sperm swim out into the HS buffer. Then, the sample was placed at room temperature for 30 min  
421 to let the debris sediment by passive sedimentation, before separating the supernatant with  
422 swimming sperm cells from the debris. The supernatant with the sperm was washed one time in  
423 PBS, which involved centrifugation at 700g for 5 min at room temperature.

424

425 Human sperm were allowed to settle at the base of a conical tube and the excess buffer was  
426 removed. The sperm sample was then passed three times through a Balch ball bearing  
427 homogenizer (Isobiotech, 15 $\mu\text{m}$  clearance).

428

### 429 **Cryo-sample preparation for cryo-ET**

430 Small aliquots of freshly prepared mouse sperm at a concentration of 1-5 x 10<sup>6</sup> cells/mL were  
431 gently mixed with 10-fold concentrated, BSA-coated 10-nm colloidal gold solution (Sigma  
432 Aldrich) at 3:1 ratio, before applying 4  $\mu\text{L}$  of the solution to a glow-discharged (30s at 35 mA)  
433 copper R 2/2 200-mesh holey carbon grid (Quantifoil Micro Tools). The grids were blotted  
434 manually from the back side with Whatman filter paper #1 for 2-4 s, before plunge-freezing the

435 grid in liquid ethane using a homemade plunge-freezer. Grids were stored under liquid nitrogen  
436 until either further preparation by cryo-focused ion beam (FIB) milling or imaging by cryo-ET.  
437 For mechanical support, grids were mounted into Autogrids (ThermoFisher).

438

439 3  $\mu$ l of the human sperm sample were applied to glow discharged copper R2/2 200-mesh holey  
440 carbon grid (Quantifoil Micro Tools) and plunge frozen in liquid ethane using an automatic  
441 plunge freezer (Vitrobot, FEI, blot force 8, blot time 8s, Whatman filter paper #1).

442

### 443 **Cryo-electron tomography**

444 Tilt series of whole or cryo-FIB milled mouse sperm flagella were acquired using a Titan Krios  
445 (Thermo Fisher Scientific) operated at 300 keV with post-column energy filter (Gatan) in zero-  
446 loss mode with 20 eV slit width. Images were recorded using a K3 Summit direct electron  
447 detector (Gatan) in counting mode with dose-fractionation (12 frames, 0.05s exposure time per  
448 frame, dose rate of 28 electrons/pixel/s for each tilt image). Tilt series were collected using  
449 SerialEM<sup>30</sup> with the Volta Phase Plate and a target defocus of -0.5  $\mu$ m. Images were recorded at  
450 26k x magnification resulting in a pixel size of 3.15  $\text{\AA}$ . Dose-symmetric tilt series<sup>31</sup> were  
451 recorded under low-dose conditions, ranging from  $\pm 60^\circ$  with  $2^\circ$  angular intervals with the total  
452 electron dose limited to  $\sim 100 \text{ e}^-/\text{\AA}^2$ .

453

454 Frozen grids of human sperm were loaded into a Jeol3100 TEM operating at 300kV equipped  
455 with an in-column energy filter and a direct electron detector (K2, Gatan). Dose-fractionated, bi-  
456 directional tilt series were acquired using SerialEM<sup>30</sup> with the following parameters: angular  
457 increment  $1.5^\circ$ , angular range about  $\pm 60^\circ$  starting at  $-20^\circ$ , energy filter slit width 30 eV,  
458 nominal magnification 10k x resulting in a detector pixel size of 3.98  $\text{\AA}$  (which was binned by x2  
459 resulting in a pixel size of 7.96  $\text{\AA}$  in the reconstruction), defocus -2.5  $\mu$ m, exposure time 1s x  
460  $1/\cos(\text{tilt angle})$ , fraction interval 0.2 s, dose rate  $1 \text{ e}^-/\text{\AA}^2/\text{s}$ , total dose  $\sim 80 \text{ e}^-/\text{\AA}^2$ .

461

### 462 **Cryo-FIB milling of mouse sperm**

463 For lamella (section) prepared by cryo-FIB-milling, clipped grids (modified Autogrids with FIB  
464 notch) with plunge-frozen mouse sperm were transferred to an Aquilos dual-beam instrument  
465 with cryo-sample stage (Thermo Fisher Scientific). Two layers of platinum were added to the  
466 sample surface to enhance sample protection and conductivity (sputter-coater: 1 keV and 30 mA  
467 for 20s; gas injection system (GIS): when needed, heated up to  $28^\circ\text{C}$ , and then deposited onto the  
468 grid for 15 seconds)<sup>32</sup>. Scanning electron beam imaging was performed at 2 kV and 25 pA, and  
469 Gallium ion beam imaging for targeting was performed at 30 kV and 1.5 pA. The target region,  
470 *i.e.* a sperm flagellum, was oriented for milling by tilting the cryo-stage to a shallow angle of  $14$   
471  $- 16^\circ$  between the ion beam and the grid. Cryo-FIB milling was performed using a 30 keV  
472 gallium ion beam with a current of 30 pA for bulk milling, 30 pA for thinning, and 10 pA for  
473 final polishing, resulting in 100-200 nm thick self-supporting lamella, that could then be imaged  
474 by cryo-ET.

475

#### 476 **Image processing of cryo-ET data**

477 For tilt series of both mouse and human sperm flagella, movie frames were aligned using  
478 Motioncor2 1.2.3<sup>33</sup>. The IMOD software<sup>34</sup> was used to align the tilt serial images using the 10-  
479 nm gold particles as fiducial markers and to reconstruct the tomograms by weighted back-  
480 projection. For subtomogram averaging, the repeating units were picked manually from raw  
481 tomograms. The repeat orientation was determined based on the polarity of the axoneme at the  
482 core of the sperm flagella. The alignment and missing-wedge-compensated averaging were  
483 performed using the PEET software<sup>35</sup>. After initial averaging a two-fold symmetry was applied.  
484 Visualization of the 3D structures of the averaged repeat units was done using the UCSF  
485 Chimera software package<sup>36</sup>. Mass estimations from a repeat unit in the subtomogram averages  
486 were calculated using the average density of 1.43 g/cm<sup>3</sup> for proteins<sup>37</sup> and normalization of the  
487 isosurface-rendering threshold in Chimera. The number of tomograms of whole cell and lamella,  
488 number of averaged repeats and estimated resolutions of the averages (using the FSC 0.5  
489 criterion), are summarized in Extended Data Table 2.

490

#### 491 **Analysis of mouse sperm motility and flagellar beating in 4D**

492 Epididymal spermatozoa from adult male mice were collected by swim-out from caudal  
493 epididymis in standard HEPES saline HS medium.

494

495 For 4D analysis, mouse sperm were washed twice in HS medium and resuspended to a final  
496 concentration of 1-2 x 10<sup>6</sup> cells/mL either under non-capacitating (HS medium) or under  
497 capacitating (HS medium, 15 mM NaHCO<sub>3</sub><sup>-</sup>, 5 mg/mL BSA) conditions. To induce capacitation  
498 *in vitro*, sperm were incubated for 90 min at 37°C and 5% CO<sub>2</sub>. 4D motility analysis was done at  
499 37°C and 5% CO<sub>2</sub> using an off-axis transmission digital holographic microscope DHM<sup>TM</sup> T-1000  
500 (Lyncée Tec SA, Geneva, Switzerland) equipped with a 666 nm laser diode source, a 20x/0.4  
501 NA objective and a Basler aca1920-155um CCD camera (Basler AG, Ahrensburg, Germany).  
502 Holographic imaging was performed as previously described<sup>27</sup>. In short, mouse sperm were  
503 placed in a 100 µm deep chamber slide (Leja) and were recorded at 100 Fps. Offline processing  
504 was done using proprietary Koala (Vers. 6; Lyncée Tec SA) and open-source Spyder (Python  
505 3.6.9) software. Using Koala software, *xy*-plane (parallel to the objective slide) projection images  
506 of sperm were numerically calculated at different focal planes (*z*-height)<sup>38,39</sup>, followed by sperm  
507 head tracking using Spyder to receive *x*, *y* and *z*-coordinates for the entire trajectory. Using these  
508 coordinates, motility parameters including 3D curvilinear velocity (VCL, in µm/s) and 2D  
509 amplitude of lateral head displacement (ALH, in µm) were analyzed. For each condition, 15 free-  
510 swimming single sperm were analyzed using three males from each genotype (wild type, *Efcab9*  
511 <sup>-/-</sup>, *Catsper1*<sup>-/-</sup>).

512

513 For 4D flagellar beating analysis, a macro written in Igor Pro<sup>TM</sup> Vers. 6.36 (Wavemetrics) was  
514 used to perform frame-by-frame tracking of flagellar images in stacks of reconstructed *xy*-

515 projections (8-bit TIFF format, 100 Fps, 10 Frame Time) with a resolution of 800 x 800 pixels as  
516 well as automatic brightness and contrast adjustments applied by ImageJ V1.50i (National  
517 Institutes of Health). A P/U value (3.7466), which is defined as the quotient from the objective  
518 magnification (20x) and the pixel size (5.34  $\mu\text{m}$ ) of the camera (Basler aca1920-155um), was  
519 used to convert pixel to micrometer. Calculation of  $z$ -coordinates was performed utilizing the  
520 received  $x$ ,  $y$ -coordinates from flagellar traces and Koala. A specific script in Spyder was used to  
521 load flagellar  $x$ ,  $y$ -coordinates into Koala. Smoothing of  $z$ -plane data was conducted with Igor  
522 Pro<sup>TM</sup> by fitting to 7<sup>th</sup> order polynomials. The determination of the distance along the flagellum  
523 in the  $xy$  projections ( $Dx$ ,  $y$ ) was carried out geometrically from adjacent pairs of  $x$ ,  $y$ -  
524 coordinates, also using a macro in Igor Pro<sup>TM</sup>.

525  
526 4D visualization of sperm flagellum and sperm swimming trajectories with respect to the  
527 laboratory fixed frame of reference ( $x$ ,  $y$ ,  $z$ ) was done using OriginPro 2020 software (OriginLab  
528 Corporation). Therefore  $x$ ,  $y$ , and  $z$ -coordinates of head and flagellar tracking were imported to  
529 the software. Analysis was performed for one whole beat-cycle, but for better illustration only,  
530 every 6<sup>th</sup> flagellar excursion between maxima of one beat cycle was illustrated (frame 0, 6, ...,  
531 42, every 60 ms) in Fig. 4. The associated movies (Extended Data Videos 3 and 4) of  
532 reconstructed trajectories of free-swimming single sperm were created with Cinema4D Vers. 18  
533 (Maxon) using  $x$ ,  $y$ , and  $z$ -values of the 4D head tracking. Adobe After Effects software Vers.  
534 CS6 (Adobe Systems Software Ireland Limited) was used for video composing and time duration  
535 adding. In each supporting video two different perspectives were used to show the 3D movement  
536 of sperm during 1s record. The rolling ball represents the sperm head, and the color code of the  
537 trajectory displays the  $z$ -excursion.

538  
539 **Quantification and statistical Analysis** Statistical analyses were carried out with GraphPad  
540 Prism 9 (Statcon GmbH) by using a two-way analysis of variance (ANOVA). Differences were  
541 considered significant at  $p < 0.05$ . Numerical results are presented as medians and interquartile  
542 ranges with  $n$  = number of determinations and  $N$  = number of independent experiments.

543  
544 **Data and software availability**

545 The averaged 3D structure of CatSper channel from mouse wild type sperm flagella has been  
546 deposited in the Electron Microscopy Data Bank (EMDB) under accession code EMD-24210.

547  
548 **Acknowledgements**

549 Authors thank Drs. Jun Liu and Shiwei Zhu for help in initial trials of mouse sperm cryo-ET at  
550 the Yale West campus Cryo-EM core, Dr. Daniel Stoddard for providing EM training and  
551 management of the UT Southwestern Medical Center (UTSW) cryo-electron microscope facility  
552 (funded in part by a Cancer Prevention and Research Institute of Texas Core Facility Award  
553 (RP170644)), David Mastronarde and John Heumann (University of Colorado at Boulder) for  
554 continued development of image processing tools, Jürgen Heger for the trajectory videos, the  
555 BioHPC supercomputing facility located in the Lyda Hill Department of Bioinformatics at



556 UTSW for the computational resources and Dr. Fred Sigworth for critically reading of the initial  
557 draft. This work was funded by the National Institutes of Health (R01HD096745 to J.-J.C.,  
558 R01GM083122 to D.N, R01GM111802 to P.V.L.), the Cancer Prevention and Research Institute  
559 of Texas (RR140082 to D.N.), the Grantham Foundation to J.-J.C. the Pew Biomedical Scholars  
560 Award and Rose Hill award to P.V.L., in part by the Office of Science of the US Department of  
561 Energy (DE-AC02-O5CH11231) and UCB start-up funds to K.M.D., and the Deutsche  
562 Forschungsgemeinschaft (2344/9-3 to G.W.). J.Y.H. and X.H. are recipients of the Male  
563 Contraceptive Initiative and James Hudson Brown-Alexander B. Coxe Postdoctoral Fellowship,  
564 respectively.

565

### 566 **Author Contributions**

567 J.-J.C. and P.L. conceived the study. D.N., and J.-J.C. designed and oversaw the project. H.W.,  
568 J.Y.H., and X.H. performed biochemical characterization of novel CatSper components and  
569 confocal and SR imaging experiments. Y.Z., H.W., and N.B.S. performed EM sample  
570 preparation and screening. Y.Z., D.N. (mouse sperm) and N.B.S., K.M.D. (human sperm)  
571 performed cryo-ET, Y.Z. performed subtomogram averaging and 3D visualization. E.R.  
572 performed cryo-FIB milling. C.W. performed sperm motility experiments and 4D flagellar  
573 beating analysis. Y.Z., H.W., and C.W. made figures. Y.Z., H.W., P.L., K.M.D., G.W., D.N., and  
574 J.-J.C. interpreted data. H.W., and J.-J.C. prepared the initial draft of the manuscript. Y.Z., H.W.,  
575 C.W., G.W., P.L., K.M.D., D.N, and J.-J.C. edited the manuscript with input from all other  
576 authors in the final version. P.L., K.M.D., G.W., D.N., and J.-J.C. obtained funding.

577

578 **Competing interests.** The authors declare no competing interests.

579

### 580 **References**

- 581 1 Austin, C. R. Observations on the penetration of the sperm in the mammalian egg. *Aust J*  
582 *Sci Res B* **4**, 581-596, doi:10.1071/bi9510581 (1951).
- 583 2 Chang, M. C. Fertilizing capacity of spermatozoa deposited into the fallopian tubes.  
584 *Nature* **168**, 697-698, doi:10.1038/168697b0 (1951).
- 585 3 Suarez, S. S. Control of hyperactivation in sperm. *Hum Reprod Update* **14**, 647-657,  
586 doi:10.1093/humupd/dmn029 (2008).
- 587 4 Carlson, A. E. *et al.* CatSper1 required for evoked Ca<sup>2+</sup> entry and control of flagellar  
588 function in sperm. *Proc Natl Acad Sci U S A* **100**, 14864-14868,  
589 doi:10.1073/pnas.2536658100 (2003).
- 590 5 Ren, D. *et al.* A sperm ion channel required for sperm motility and male fertility. *Nature*  
591 **413**, 603-609, doi:10.1038/35098027 (2001).
- 592 6 Wang, H., McGoldrick, L. L. & Chung, J. J. Sperm ion channels and transporters in male  
593 fertility and infertility. *Nat Rev Urol* **18**, 46-66, doi:10.1038/s41585-020-00390-9 (2021).



- 594 7 Qi, H. *et al.* All four CatSper ion channel proteins are required for male fertility and  
595 sperm cell hyperactivated motility. *Proc Natl Acad Sci U S A* **104**, 1219-1223,  
596 doi:10.1073/pnas.0610286104 (2007).
- 597 8 Chung, J. J. *et al.* CatSper $\zeta$  regulates the structural continuity of sperm Ca(2+) signaling  
598 domains and is required for normal fertility. *Elife* **6**, doi:10.7554/eLife.23082 (2017).
- 599 9 Chung, J. J., Navarro, B., Krapivinsky, G., Krapivinsky, L. & Clapham, D. E. A novel gene  
600 required for male fertility and functional CATSPER channel formation in spermatozoa.  
601 *Nat Commun* **2**, 153, doi:10.1038/ncomms1153 (2011).
- 602 10 Liu, J., Xia, J., Cho, K. H., Clapham, D. E. & Ren, D. CatSperbeta, a novel transmembrane  
603 protein in the CatSper channel complex. *J Biol Chem* **282**, 18945-18952,  
604 doi:10.1074/jbc.M701083200 (2007).
- 605 11 Wang, H., Liu, J., Cho, K. H. & Ren, D. A novel, single, transmembrane protein CATSPERG  
606 is associated with CATSPER1 channel protein. *Biol Reprod* **81**, 539-544,  
607 doi:10.1095/biolreprod.109.077107 (2009).
- 608 12 Hwang, J. Y. *et al.* Dual Sensing of Physiologic pH and Calcium by EFCAB9 Regulates  
609 Sperm Motility. *Cell* **177**, 1480-1494.e1419, doi:10.1016/j.cell.2019.03.047 (2019).
- 610 13 Hwang, J. Y., Maziarz, J., Wagner, G. P. & Chung, J. J. Molecular Evolution of CatSper in  
611 Mammals and Function of Sperm Hyperactivation in Gray Short-Tailed Opossum. *Cells*  
612 **10**, doi:10.3390/cells10051047 (2021).
- 613 14 Chung, J. J. *et al.* Structurally distinct Ca(2+) signaling domains of sperm flagella  
614 orchestrate tyrosine phosphorylation and motility. *Cell* **157**, 808-822,  
615 doi:10.1016/j.cell.2014.02.056 (2014).
- 616 15 Schiffer, C. *et al.* Rotational motion and rheotaxis of human sperm do not require  
617 functional CatSper channels and transmembrane Ca(2+) signaling. *Embo j* **39**, e102363,  
618 doi:10.15252/embj.2019102363 (2020).
- 619 16 Ded, L., Hwang, J. Y., Miki, K., Shi, H. F. & Chung, J. J. 3D in situ imaging of the female  
620 reproductive tract reveals molecular signatures of fertilizing spermatozoa in mice. *Elife*  
621 **9**, doi:10.7554/eLife.62043 (2020).
- 622 17 Roth, M., Obaidat, A. & Hagenbuch, B. OATPs, OATs and OCTs: the organic anion and  
623 cation transporters of the SLCO and SLC22A gene superfamilies. *Br J Pharmacol* **165**,  
624 1260-1287, doi:10.1111/j.1476-5381.2011.01724.x (2012).
- 625 18 Suzuki, T. *et al.* Identification and characterization of novel rat and human gonad-  
626 specific organic anion transporters. *Mol Endocrinol* **17**, 1203-1215,  
627 doi:10.1210/me.2002-0304 (2003).
- 628 19 Li, L. J., Zheng, J. C., Kang, R. & Yan, J. Q. Targeting Trim69 alleviates high fat diet (HFD)-  
629 induced hippocampal injury in mice by inhibiting apoptosis and inflammation through  
630 ASK1 inactivation. *Biochem Biophys Res Commun* **515**, 658-664,  
631 doi:10.1016/j.bbrc.2019.05.027 (2019).
- 632 20 *International Mouse Phenotyping Consortium*,  
633 <<https://www.mousephenotype.org/data/genes/MGI:1921691#phenotypesTab>> (  
634 21 Trötschel, C. *et al.* Absolute proteomic quantification reveals design principles of sperm  
635 flagellar chemosensation. *Embo j* **39**, e102723, doi:10.15252/embj.2019102723 (2020).
- 636 22 Wu, J. *et al.* Structure of the voltage-gated calcium channel Cav1.1 complex. *Science*  
637 **350**, aad2395, doi:10.1126/science.aad2395 (2015).

- 638 23 Balbach, M. *et al.* Metabolic changes in mouse sperm during capacitation†. *Biol Reprod*  
639 **103**, 791-801, doi:10.1093/biolre/ioaa114 (2020).
- 640 24 Hidalgo, D. M. *et al.* Capacitation increases glucose consumption in murine sperm. *Mol*  
641 *Reprod Dev* **87**, 1037-1047, doi:10.1002/mrd.23421 (2020).
- 642 25 Miki, K. *et al.* Glyceraldehyde 3-phosphate dehydrogenase-S, a sperm-specific glycolytic  
643 enzyme, is required for sperm motility and male fertility. *Proc Natl Acad Sci U S A* **101**,  
644 16501-16506, doi:10.1073/pnas.0407708101 (2004).
- 645 26 Xia, J. & Ren, D. The BSA-induced Ca<sup>2+</sup> influx during sperm capacitation is CATSPER  
646 channel-dependent. *Reprod Biol Endocrinol* **7**, 119, doi:10.1186/1477-7827-7-119  
647 (2009).
- 648 27 Muschol, M., Wenders, C. & Wennemuth, G. Four-dimensional analysis by high-speed  
649 holographic imaging reveals a chiral memory of sperm flagella. *PLoS One* **13**, e0199678,  
650 doi:10.1371/journal.pone.0199678 (2018).
- 651 28 Liu, B. *et al.* Recording Electrical Currents across the Plasma Membrane of Mammalian  
652 Sperm Cells. *J Vis Exp*, doi:10.3791/62049 (2021).
- 653 29 Hutcheon, K. *et al.* Analysis of the small non-protein-coding RNA profile of mouse  
654 spermatozoa reveals specific enrichment of piRNAs within mature spermatozoa. *RNA*  
655 *Biol* **14**, 1776-1790, doi:10.1080/15476286.2017.1356569 (2017).
- 656 30 Mastronarde, D. N. Automated electron microscope tomography using robust prediction  
657 of specimen movements. *J Struct Biol* **152**, 36-51, doi:10.1016/j.jsb.2005.07.007 (2005).
- 658 31 Hagen, W. J. H., Wan, W. & Briggs, J. A. G. Implementation of a cryo-electron  
659 tomography tilt-scheme optimized for high resolution subtomogram averaging. *J Struct*  
660 *Biol* **197**, 191-198, doi:10.1016/j.jsb.2016.06.007 (2017).
- 661 32 Schaffer, M. *et al.* Optimized cryo-focused ion beam sample preparation aimed at in situ  
662 structural studies of membrane proteins. *J Struct Biol* **197**, 73-82,  
663 doi:10.1016/j.jsb.2016.07.010 (2017).
- 664 33 Zheng, S. Q. *et al.* MotionCor2: anisotropic correction of beam-induced motion for  
665 improved cryo-electron microscopy. *Nat Methods* **14**, 331-332, doi:10.1038/nmeth.4193  
666 (2017).
- 667 34 Kremer, J. R., Mastronarde, D. N. & McIntosh, J. R. Computer visualization of three-  
668 dimensional image data using IMOD. *J Struct Biol* **116**, 71-76,  
669 doi:10.1006/jsbi.1996.0013 (1996).
- 670 35 Nicastro, D. *et al.* The molecular architecture of axonemes revealed by cryoelectron  
671 tomography. *Science* **313**, 944-948, doi:10.1126/science.1128618 (2006).
- 672 36 Pettersen, E. F. *et al.* UCSF Chimera--a visualization system for exploratory research and  
673 analysis. *J Comput Chem* **25**, 1605-1612, doi:10.1002/jcc.20084 (2004).
- 674 37 Quillin, M. L. & Matthews, B. W. Accurate calculation of the density of proteins. *Acta*  
675 *Crystallogr D Biol Crystallogr* **56**, 791-794, doi:10.1107/s090744490000679x (2000).
- 676 38 Colomb, T. *et al.* Extended depth-of-focus by digital holographic microscopy. *Opt Lett*  
677 **35**, 1840-1842, doi:10.1364/ol.35.001840 (2010).
- 678 39 Rappaz, B. *et al.* Measurement of the integral refractive index and dynamic cell  
679 morphometry of living cells with digital holographic microscopy. *Opt Express* **13**, 9361-  
680 9373, doi:10.1364/opex.13.009361 (2005).
- 681
